# Supplementary material for: Hydrothermal growth of ZnO nanorods on Zn substrates and their application in degradation of azo dyes under ambient conditions
Source: Royal Society of Chemistry journal article supplement (doi:10.1039/c4ce00899e), 2014-01-01
Supplement: c4ce00899e1.pdf [file c4ce00899e1.pdf]

Electronic Supplementary Material (ESI) for CrystEngComm.  
This journal is © The Royal Society of Chemistry 2014

## **Hydrothermal growth of ZnO nanorods on Zn substrates and their application in degradation of azo dyes under ambient conditions**

Xiaoyan Cai <sup>a</sup>, Bingqian Han <sup>a</sup>, Shaojuan Deng <sup>a</sup>, Yan Wang <sup>a</sup>, Chengjun Dong <sup>a</sup>, Yude Wang <sup>a, b\*</sup>, and Igor Djerdj <sup>c\*</sup>

<sup>a</sup>*Department of Materials Science & Engineering, Yunnan University, 650091 Kunming, People's Republic of China*

<sup>b</sup>*State Key Lab of Silicon Materials, Zhejiang University, Hangzhou 310027, People's Republic of China*

<sup>c</sup>*Ruđer Bošković Institute, Bijenička 54, 10000 Zagreb, Croatia*

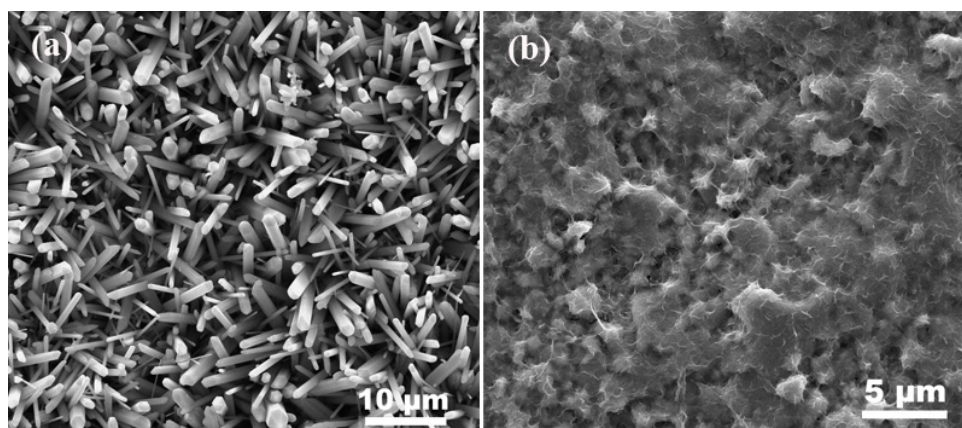

**Fig. S1** SEM images of ZnO nanorod arrays: (a) Z-5; (b) Z-6.

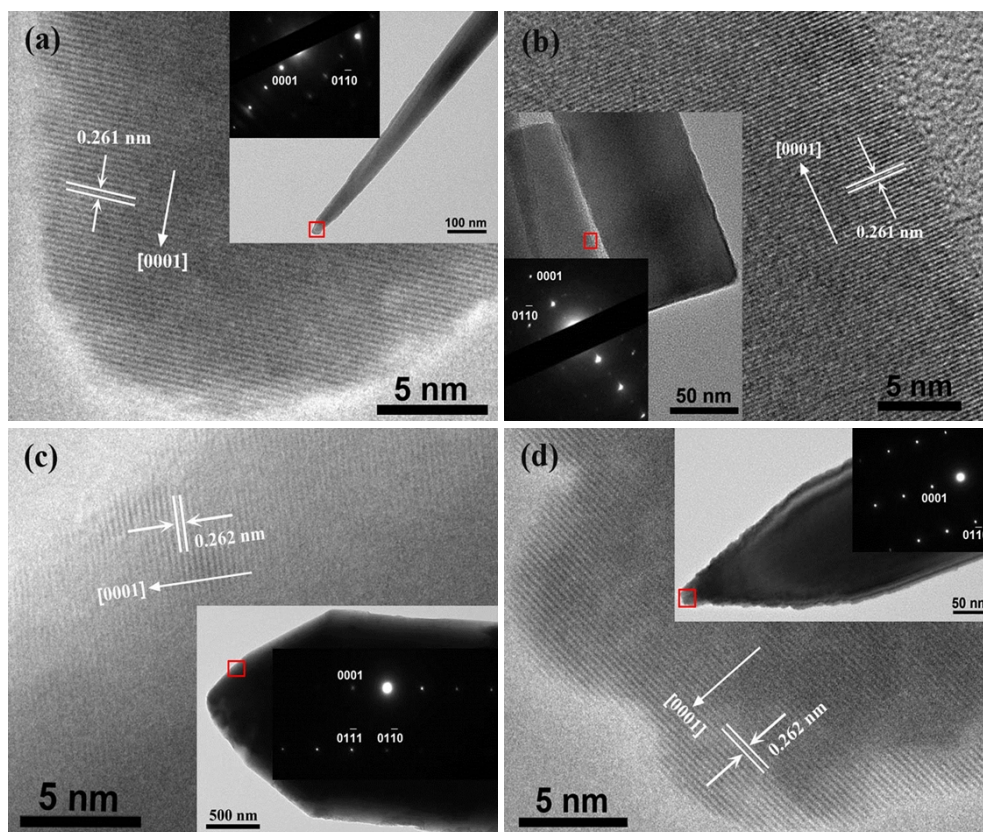

**Fig. S2** HRTEM images of the nanorods at the tip ((a) Z-1, (d) Z-4) and the side ((b) Z-2, (c) Z-3). The inserts are whole view of the tops, and electron diffraction patterns from the nanorods show the same growth direction of [0001].

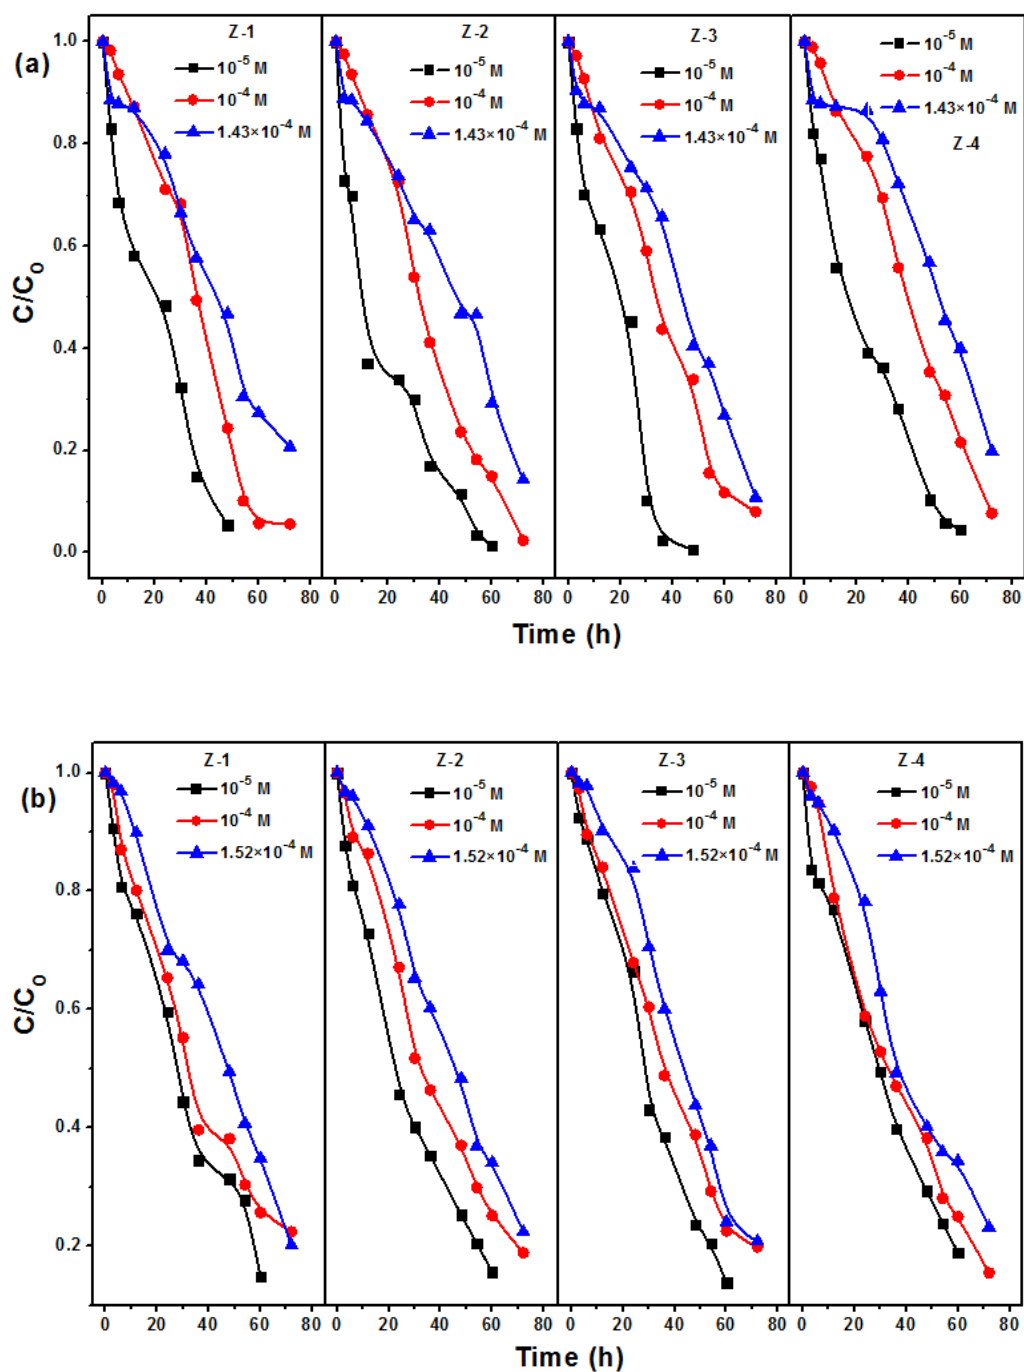

**Fig. S3** The comparative degradation rate of azo dyes with different concentration ( $10^{-5}$  M,  $10^{-4}$  M and greater than  $10^{-4}$  M) under dark condition in the presence of sample Z-1, Z-2, Z-3 and Z-4 (2cm×2cm): (a) CR (40 mL); (b) MO (40 mL).

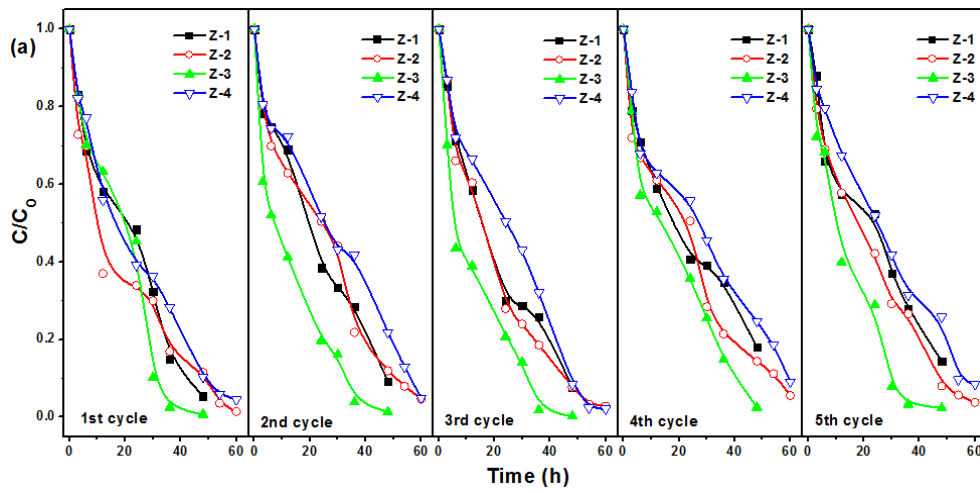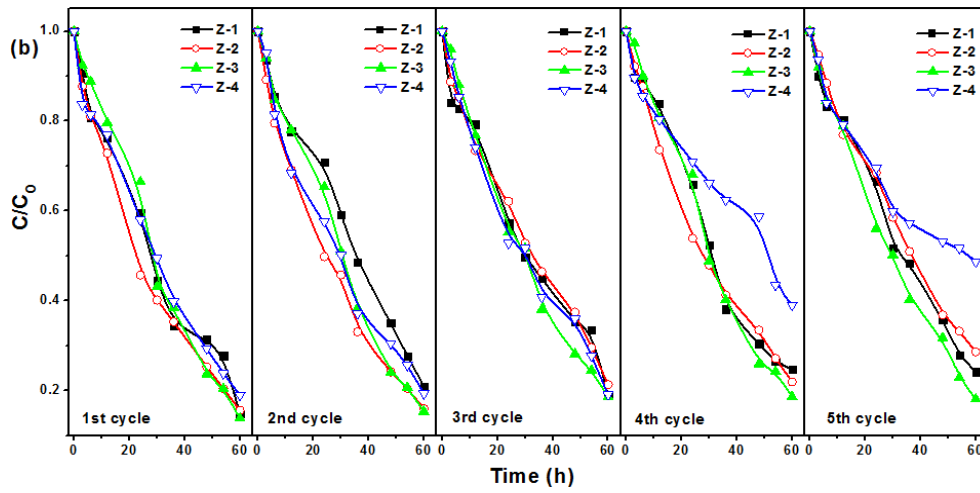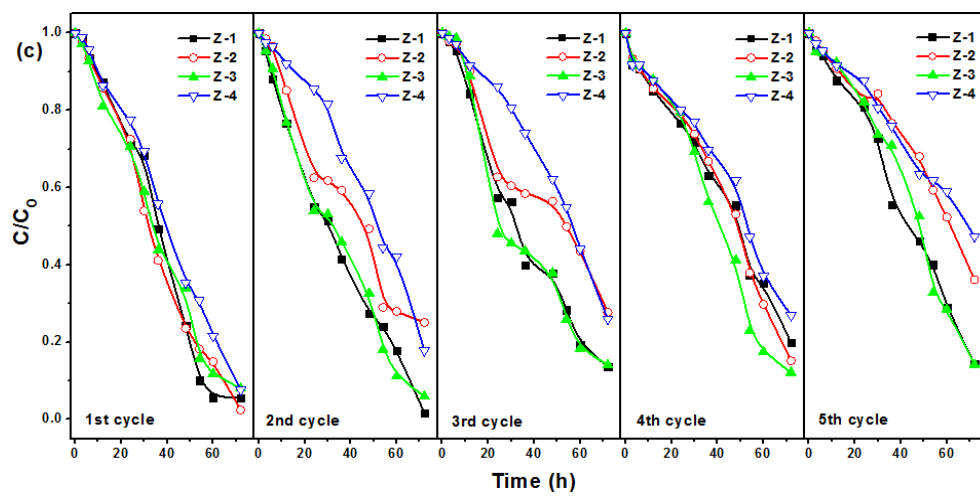

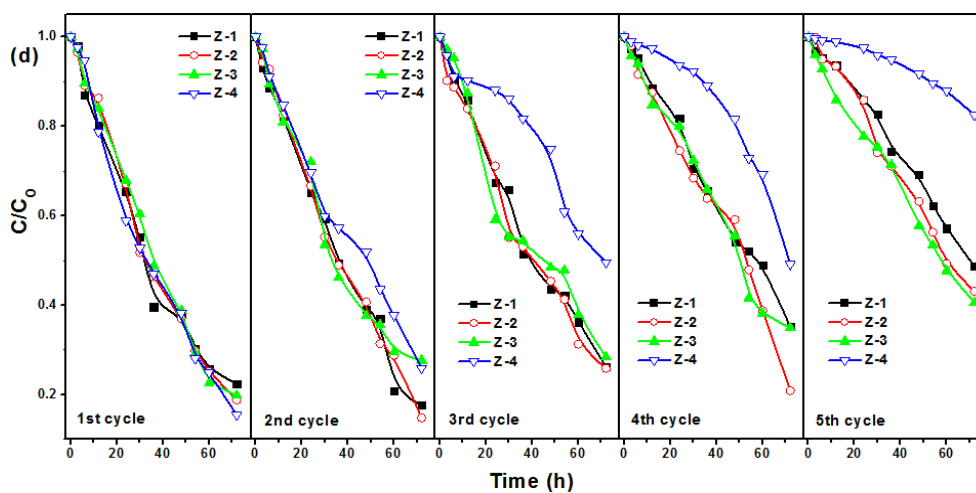

**Fig. S4** Cycling runs in the catalytic degradation rate of azo dyes under dark condition in the presence of sample Z-1, Z-2, Z-3 and Z-4 (2cm×2cm ): (a) CR (10<sup>-5</sup> M, 40 mL); (b) MO (10<sup>-5</sup> M, 40 mL); (c) CR (10<sup>-4</sup> M, 40 mL); (d) MO (10<sup>-4</sup> M, 40 mL).

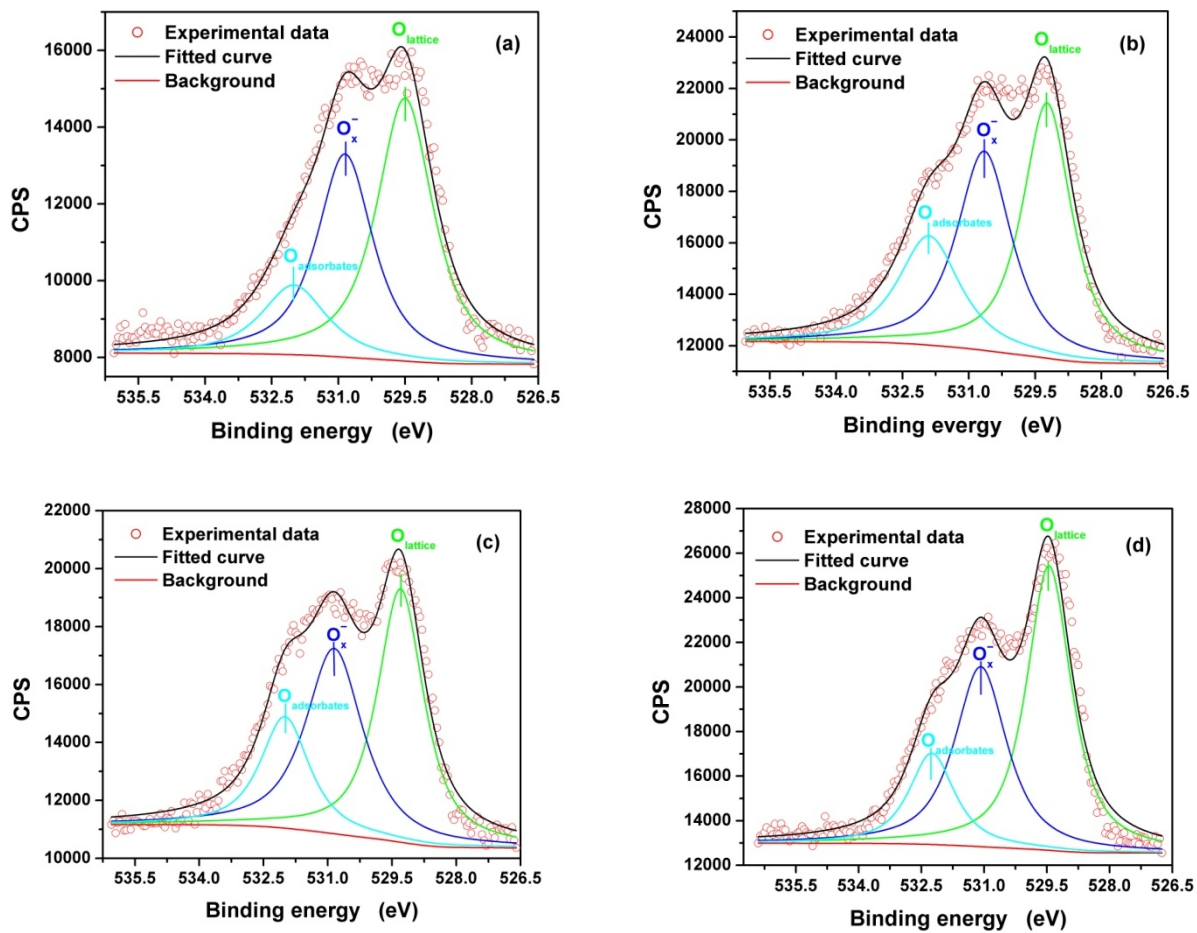

**Fig. S5** High-resolution XPS spectra of O 1s of the sample Z-1 and Z-3 before ((a) Z-1, (c) Z-3) and after ((b) Z-1, (d) Z-3) degradation of 5 cycling runs under dark condition, respectively.
